# Supplementary material
Source: PubMed Central journal article supplement (PMC7467716)
Supplement: jf0c02158_si_001.pdf [file jf0c02158_si_001.pdf]

## Supporting information

### Changes in the Proanthocyanidin Composition and Related Gene Expression in Bilberry

(*Vaccinium myrtillus* L.)

Jussi Suvanto<sup>1,\*</sup>, Katja Karppinen<sup>2</sup>, Kaisu Riihinen<sup>3</sup>, Laura Jaakola<sup>2,4</sup>, and Juha-Pekka Salminen<sup>1</sup>

<sup>1</sup> Natural Chemistry Research Group, Department of Chemistry, University of Turku, FI-20014, Turku, Finland

<sup>2</sup> Department of Arctic and Marine Biology, UiT the Arctic University of Norway, NO-9037 Tromsø, Norway

<sup>3</sup> Institute of Public Health and Clinical Nutrition, University of Eastern Finland, FI-70211 Kuopio, Finland

<sup>4</sup> Norwegian Institute of Bioeconomy Research (NIBIO), NO-1431 Ås, Norway

\* Corresponding author. E-mail: [jussi.suvanto@utu.fi](mailto:jussi.suvanto@utu.fi)

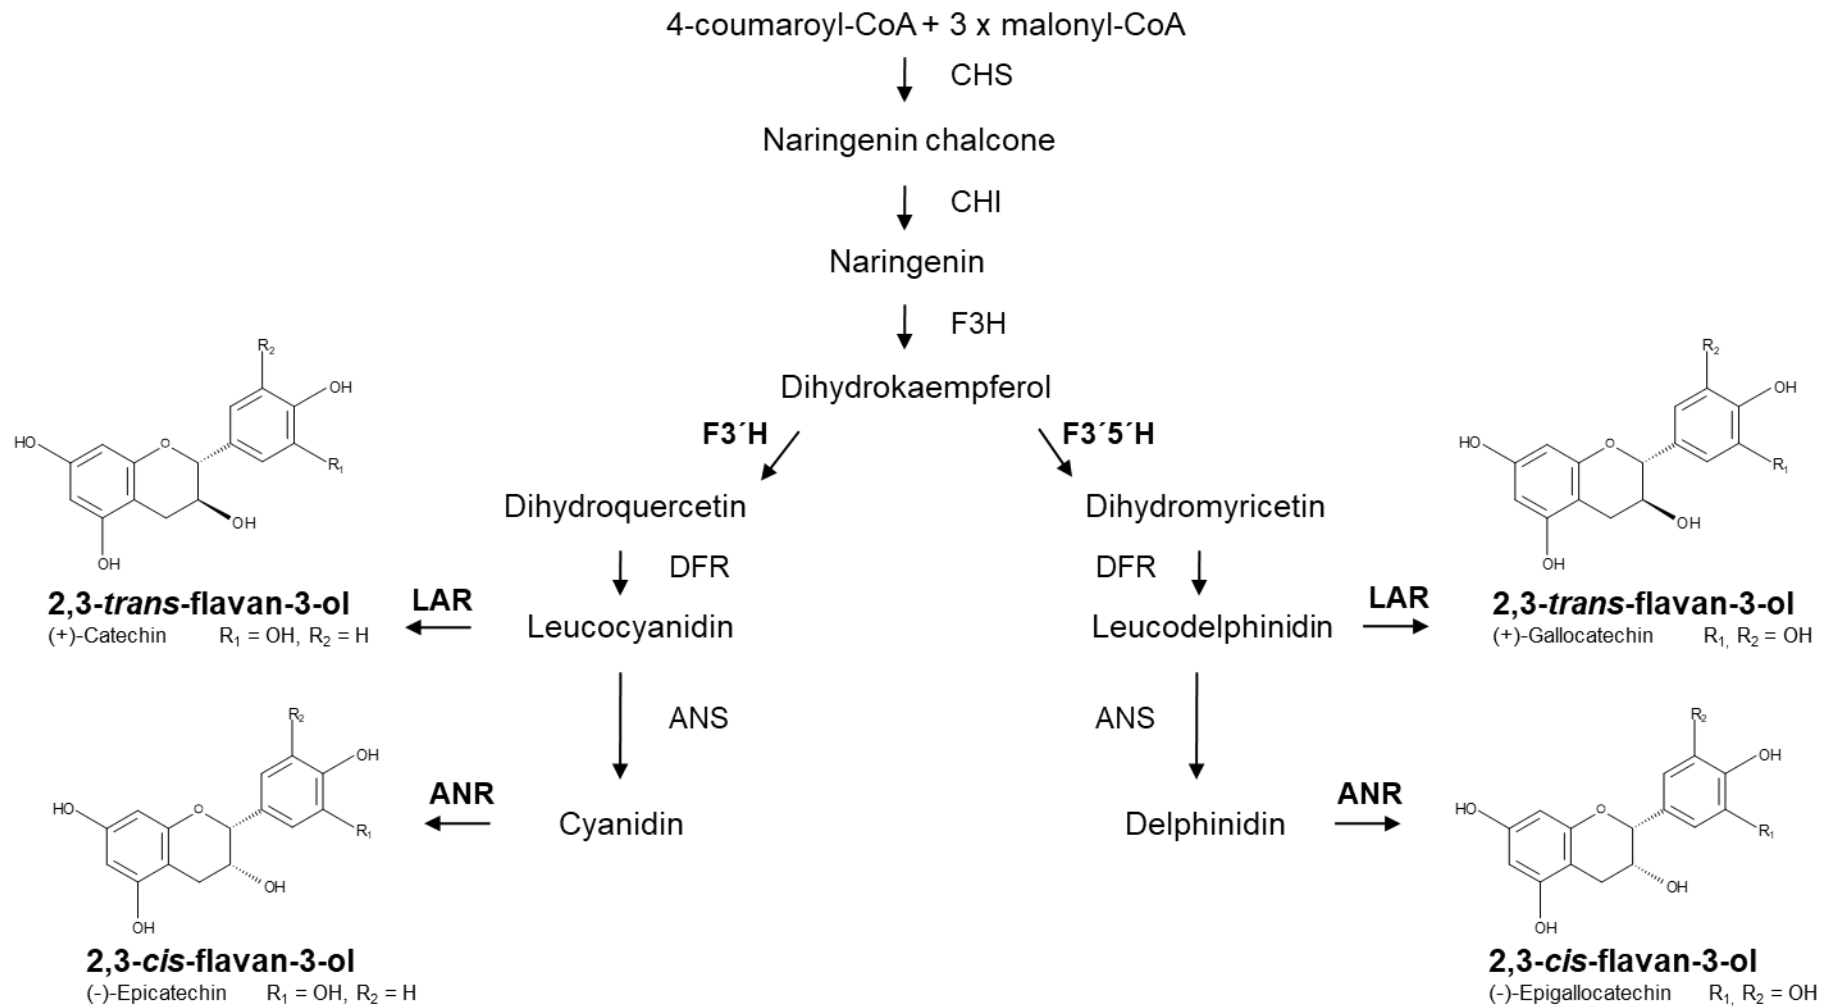

**Figure S1.** The PA biosynthetic pathway. CHS, chalcone synthase; CHI, chalcone isomerase; F3H, flavanone 3-hydroxylase; F3'H, flavonoid 3'-hydroxylase; F3'5'H, flavonoid 3'5'-hydroxylase; DFR, dihydroflavonol 4-reductase; ANS, anthocyanidin synthase; LAR, leucoanthocyanidin reductase; ANR, anthocyanidin reductase.

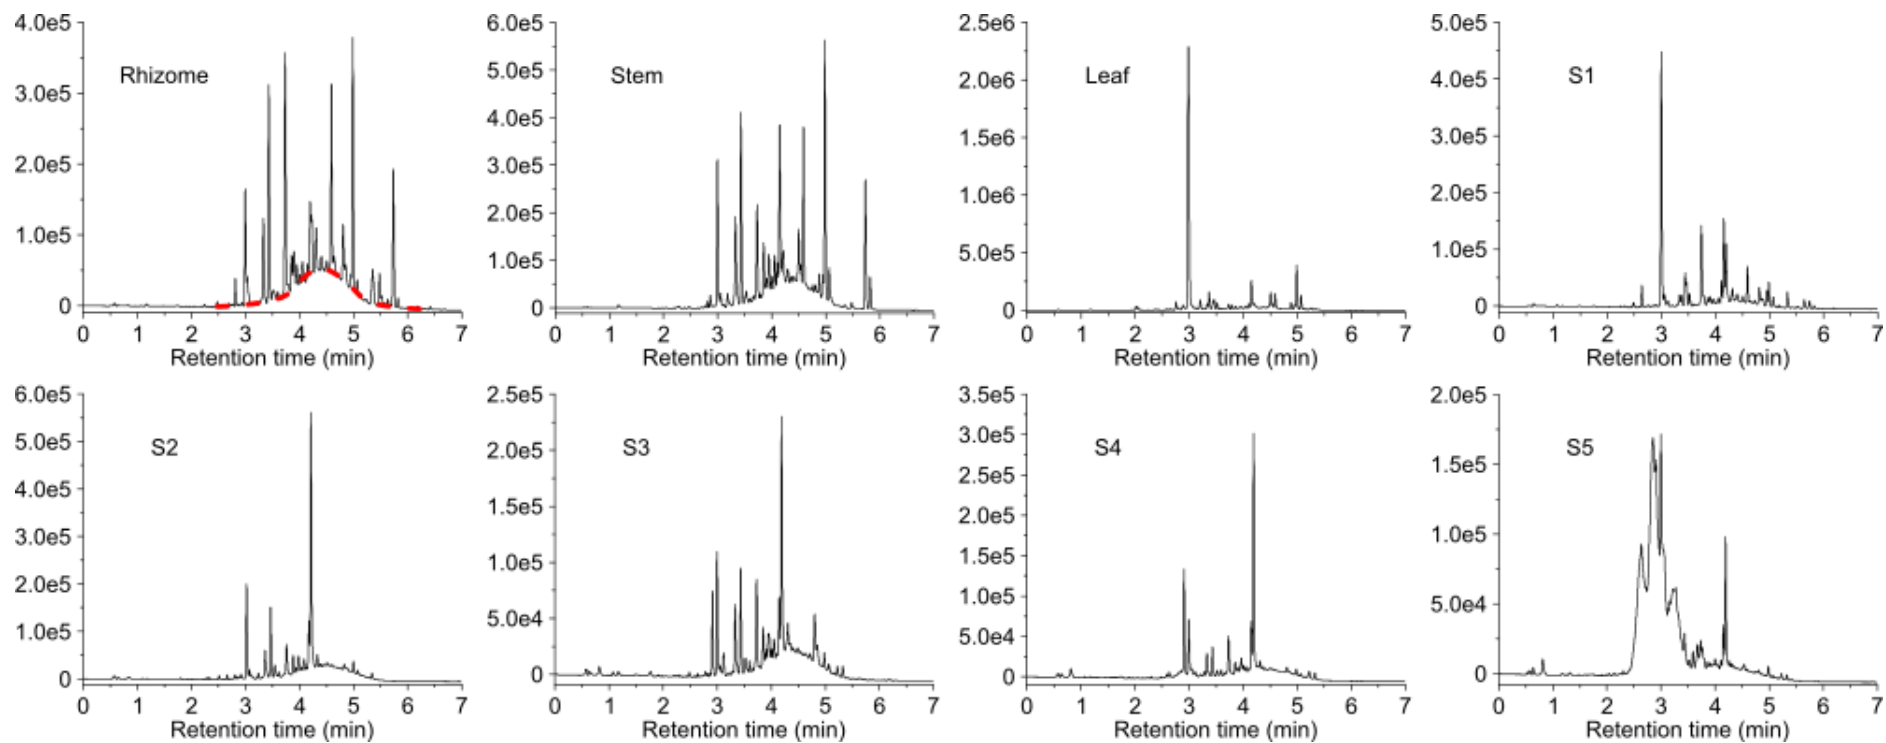

**Figure S2.** UV chromatograms ( $\lambda=280$  nm) of the bilberry tissue samples from the UHPLC-DAD-ESI-3Q-MS analyses. The dashed red line in the rhizome chromatogram shows an example of the chromatographic hump caused by PAs, which are not separated from one another when using reversed-phase liquid chromatography.

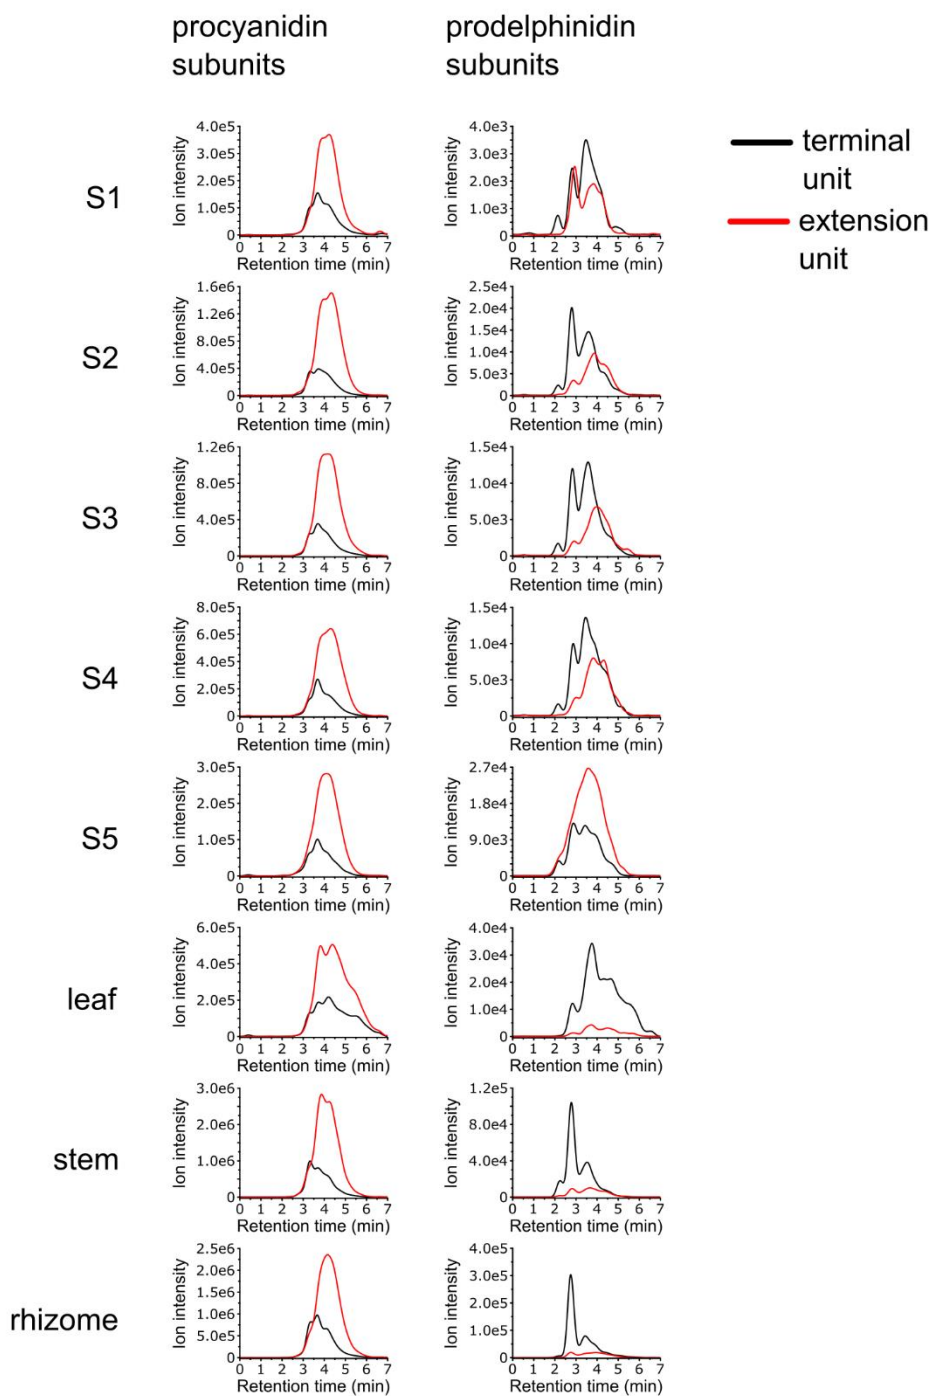

**Figure S3.** Fingerprints of PCs and PDs in bilberry tissues determined from the UHPLC-DAD-ESI-3Q-MS analyses, showing terminal and extension units separately.



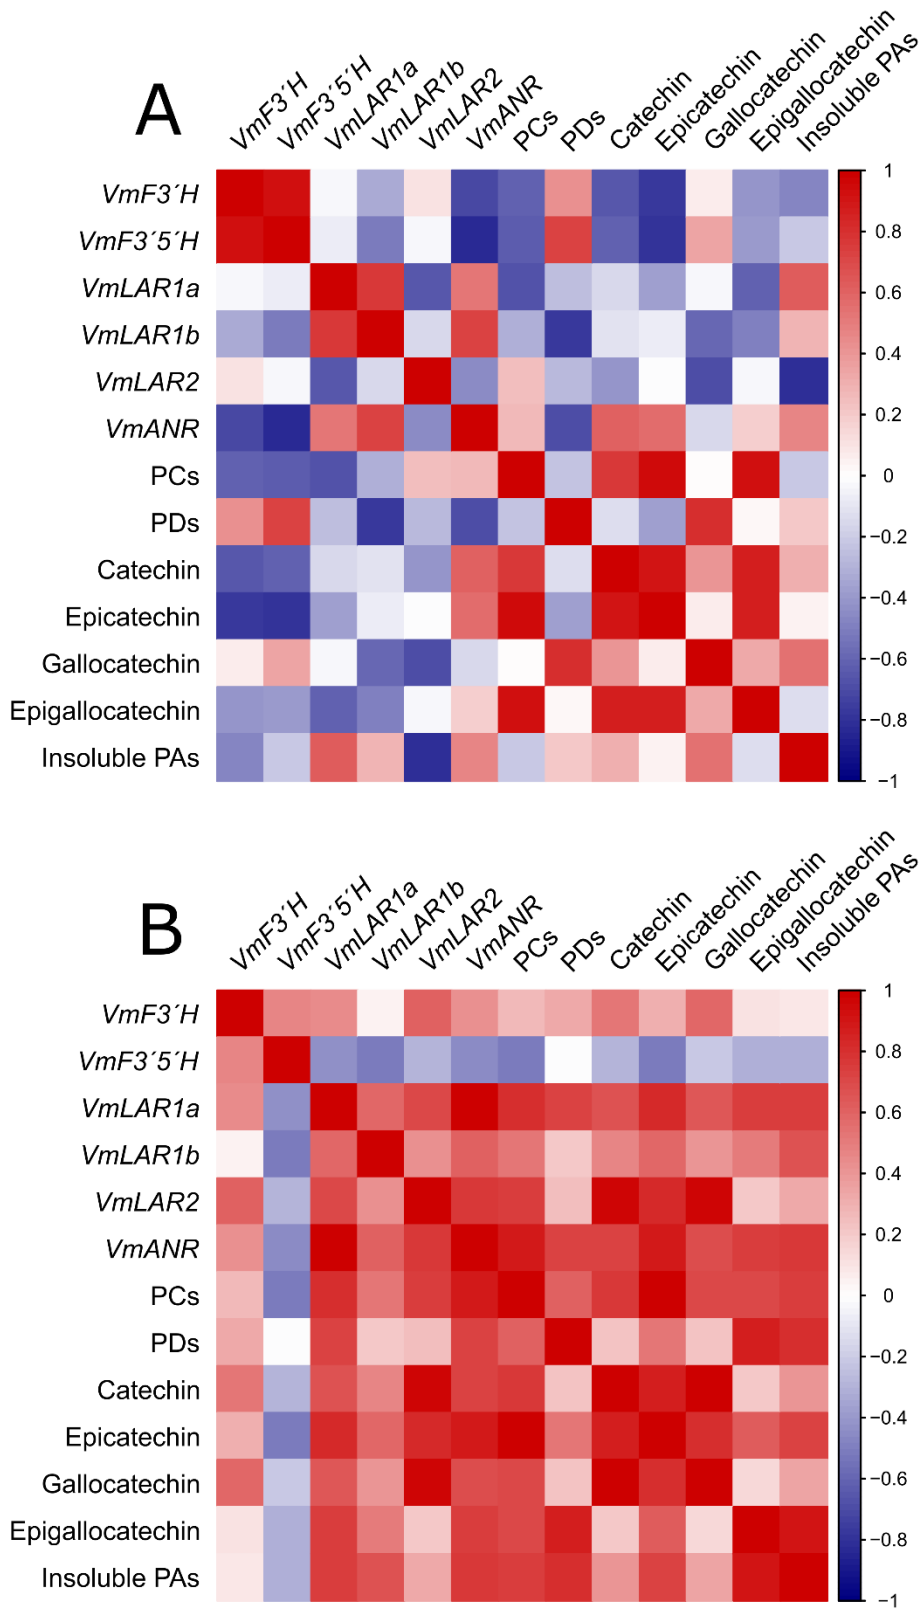

**Figure S5.** Correlation matrices of measured concentrations and expressions among berry (A) and all tissue (B) samples.

**Table S1.** Gene-specific primers used for quantitative real-time PCR analysis.

| Gene            | Primer sequence 5'-3'                                                |
|-----------------|----------------------------------------------------------------------|
| <i>VmF3'H</i>   | TTCTTCGACACCCGAAAGTC (forward)<br>TCGAACCCTTTGGAATGAAG (reverse)     |
| <i>VmF3'5'H</i> | GATTGCGTGGATGGACTTACA (forward)<br>AAATCTGGGTTCCCTTTACGC (reverse)   |
| <i>VmLAR1a</i>  | CAGAGGGTCCTGATAATTGGAG (forward)<br>CATTGGAAGAACCAGACCTGAC (reverse) |
| <i>VmLAR1b</i>  | CGTTGATCACAGCTTCTGTTGC (forward)<br>CGCCTTTGTCTTGGAGAGTCTT (reverse) |
| <i>VmLAR2</i>   | GGGTGGTGTTAGCATCTTGGAC (forward)<br>CCAGCTGCTTCTATAGCCCTTC (reverse) |
| <i>VmANR</i>    | GCTGGTGTCTTCTCCACAAT (forward)<br>AAATATATGGGCGCGACAAA (reverse)     |
| <i>VmGAPDH</i>  | CAAAGTGTCTTGCCCCACTT (forward)<br>CAGGCAACACCTTACCAACA (reverse)     |

**Table S2.** A heatmap of the semiquantitative relative concentrations of dimeric and trimeric PAs with A- and B-type bonds.

| m/z    | structure   |             |              | relative concentration <sup>a</sup> |       |       |       |      |       |        |         |
|--------|-------------|-------------|--------------|-------------------------------------|-------|-------|-------|------|-------|--------|---------|
|        | PC subunits | PD subunits | A-type bonds | S1                                  | S2    | S3    | S4    | S5   | leaf  | stem   | rhizome |
| 575.12 | 2           | 0           | 1            | 5.73                                | 6.79  | 7.45  | 5.39  | 2.26 | 2.06  | 13.22  | 35.88   |
| 577.14 | 2           | 0           | 0            | 10.41                               | 21.80 | 26.15 | 11.91 | 4.14 | 11.08 | 100.00 | 5.89    |
| 591.11 | 1           | 1           | 1            | 1.47                                | 2.38  | 2.07  | 1.60  | 1.45 | 3.62  | 21.85  | 5.05    |
| 593.13 | 1           | 1           | 0            | 1.22                                | 2.24  | 1.67  | 1.40  | 2.37 | 1.57  | 7.98   | 6.81    |
| 607.11 | 0           | 2           | 1            | 0.28                                | 0.35  | 0.34  | 0.38  | 0.91 | 0.59  | 0.89   | 1.19    |
| 609.13 | 0           | 2           | 0            | 1.22                                | 0.66  | 0.50  | 0.44  | 1.42 | 1.28  | 3.91   | 3.03    |
| 861.17 | 3           | 0           | 2            | 0.47                                | 0.48  | 0.62  | 0.62  | 0.30 | 0.43  | 1.06   | 3.57    |
| 863.18 | 3           | 0           | 1            | 4.69                                | 7.99  | 9.91  | 8.33  | 3.17 | 1.89  | 19.20  | 62.64   |
| 865.20 | 3           | 0           | 0            | 5.53                                | 18.06 | 16.29 | 7.36  | 2.39 | 7.53  | 66.47  | 31.17   |
| 877.16 | 2           | 1           | 2            | 0.36                                | 0.32  | 0.35  | 0.33  | 0.37 | 1.21  | 1.73   | 2.14    |
| 879.18 | 2           | 1           | 1            | 0.67                                | 1.51  | 1.33  | 1.01  | 1.15 | 0.74  | 4.20   | 8.09    |
| 881.19 | 2           | 1           | 0            | 0.52                                | 1.54  | 1.13  | 0.89  | 1.90 | 0.82  | 4.18   | 3.15    |
| 893.16 | 1           | 2           | 2            | 0.04                                | 0.14  | 0.16  | 0.09  | 0.29 | 0.10  | 0.45   | 0.50    |
| 895.17 | 1           | 2           | 1            | 0.13                                | 0.24  | 0.28  | 0.26  | 3.37 | 0.07  | 0.69   | 1.03    |
| 897.19 | 1           | 2           | 0            | 0.19                                | 0.51  | 0.34  | 0.21  | 1.29 | 0.47  | 1.39   | 0.50    |
| 909.15 | 0           | 3           | 2            | 0.03                                | 0.02  | 0.01  | 0.00  | 0.25 | 0.20  | 0.20   | 0.08    |
| 911.17 | 0           | 3           | 1            | 0.08                                | 0.10  | 0.08  | 0.06  | 0.78 | 0.28  | 0.27   | 0.36    |
| 913.18 | 0           | 3           | 0            | 0.02                                | 0.12  | 0.11  | 0.07  | 2.87 | 0.16  | 0.38   | 0.23    |

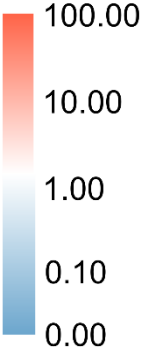

<sup>a</sup> The values are normalized (0–100) peak areas per dry weight of the corresponding calculated m/z ( $\pm 0.10$ ) values of the theoretical singly charged ions from extracted ion chromatograms. Red and blue colour indicate high and low quantities, respectively, on a logarithmic scale.
